# Supplementary material for: Highly stable CdTe quantum dots hosted in gypsum via a flocculation–precipitation method
Source: Royal Society of Chemistry journal article supplement (doi:10.1039/c9tc04412d), 2019-01-01
Supplement: c9tc04412d1.pdf [file c9tc04412d1.pdf]

Supporting Information

**Highly stable CdTe quantum dots hosted in gypsum via a  
flocculation-precipitation method**

Yajing Chang, Xiaopeng Cheng, Jinhua Zhang and Dabin Yu\*

State Key Laboratory of Pulsed Power Laser Technology, National University of  
Defense Technology, Hefei, Anhui, 230037, P. R. China

Corresponding Author

E-mails: [dabinyu@sina.cn](mailto:dabinyu@sina.cn) (D. Yu)

**Table S1** Fluorescence characters of CdTe QDs with different sizes.

| CdTe QDs | QDs size (nm) | Absorption peak (nm) | Emission peak (nm) | FWHM (nm) | PLQY (%) |
|----------|---------------|----------------------|--------------------|-----------|----------|
| 1        | 2.5           | 506                  | 552                | 56        | 19       |
| 2        | 2.8           | 518                  | 569                | 64        | 21       |
| 3        | 3.0           | 532                  | 584                | 67        | 24       |
| 4        | 3.3           | 561                  | 621                | 70        | 28       |

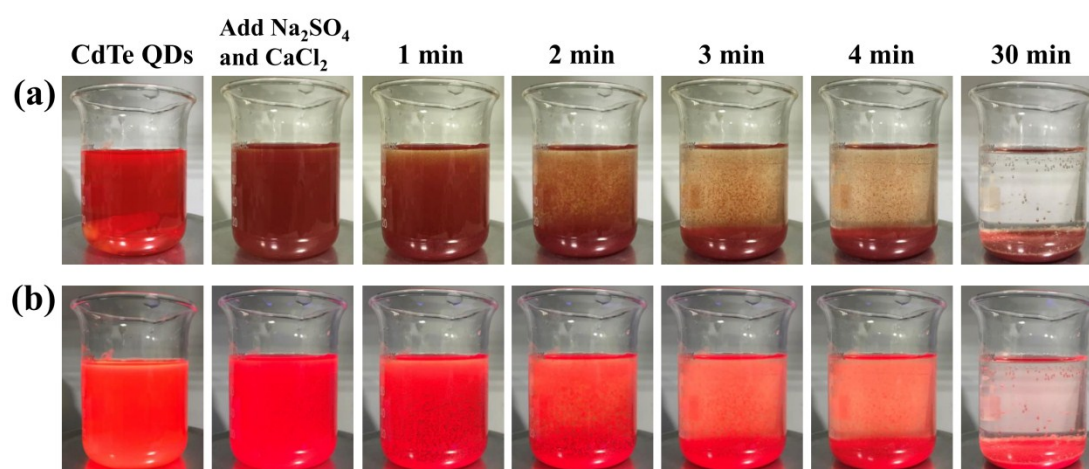

**Fig. S1** True color image of the incorporation and flocculation process of CdTe-gypsum nanocomposites (a) under daylight and (b) under 365 nm UV lamp.

**Table S2** Fluorescence characters of CdTe-gypsum nanocomposites with different QDs sizes.

| CdTe-gypsum | QDs size (nm) | Absorption peak (nm) | Emission peak (nm) | FWHM (nm) | PLQY (%) |
|-------------|---------------|----------------------|--------------------|-----------|----------|
| 1           | 2.5           | 507                  | 561                | 51        | 15       |
| 2           | 2.8           | 518                  | 586                | 53        | 18       |
| 3           | 3.0           | 538                  | 610                | 63        | 22       |
| 4           | 3.3           | 567                  | 630                | 72        | 27       |

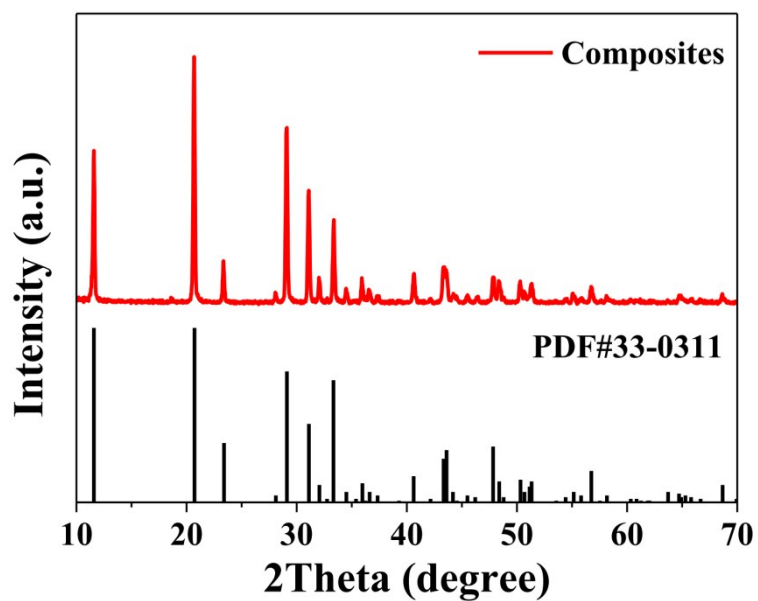

**Fig. S2** XRD pattern of CdTe-gypsum nanocomposites (red curve). As comparison, the standard XRD pattern of gypsum is also provided.

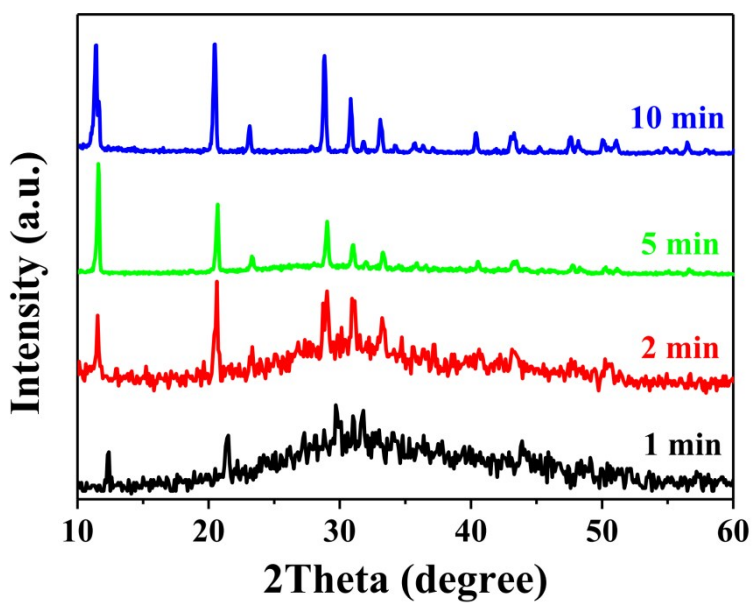

**Fig. S3** XRD pattern of the in-situ crystallization process of CdTe-gypsum nanocomposites.

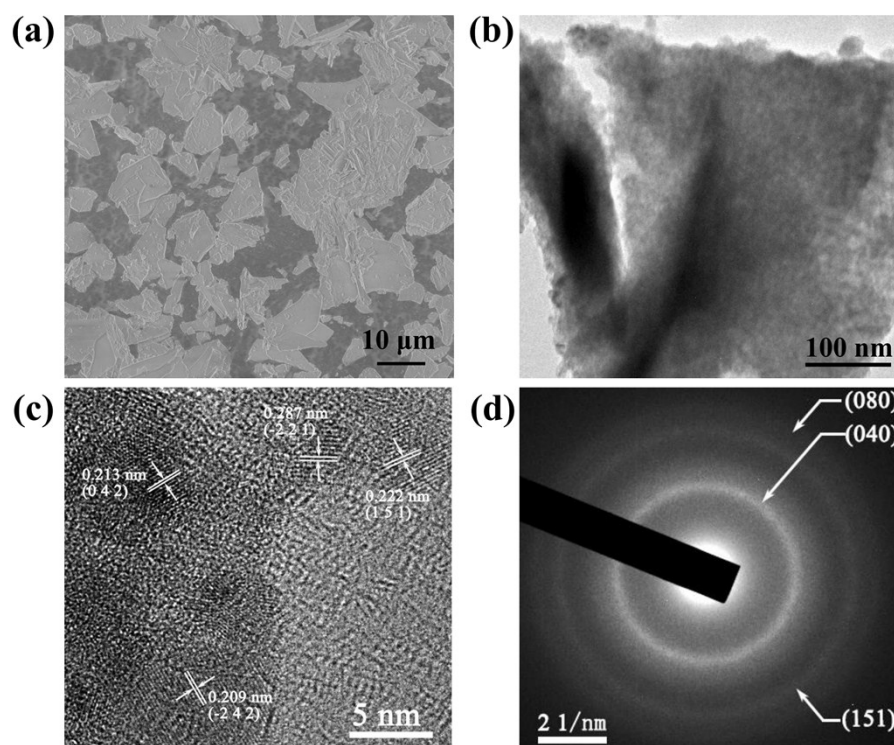

**Fig. S4** (a) SEM, (b) TEM, (c) HRTEM and (d) selected area electron diffraction (SEAD) image of CdTe-gypsum nanocomposites.

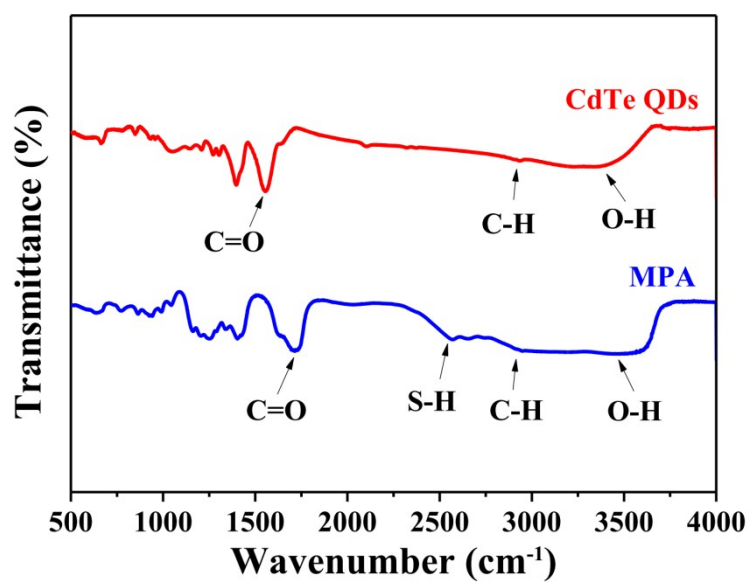

**Fig. S5** FTIR spectra of MPA (blue curve) and CdTe QDs powders (red curve).

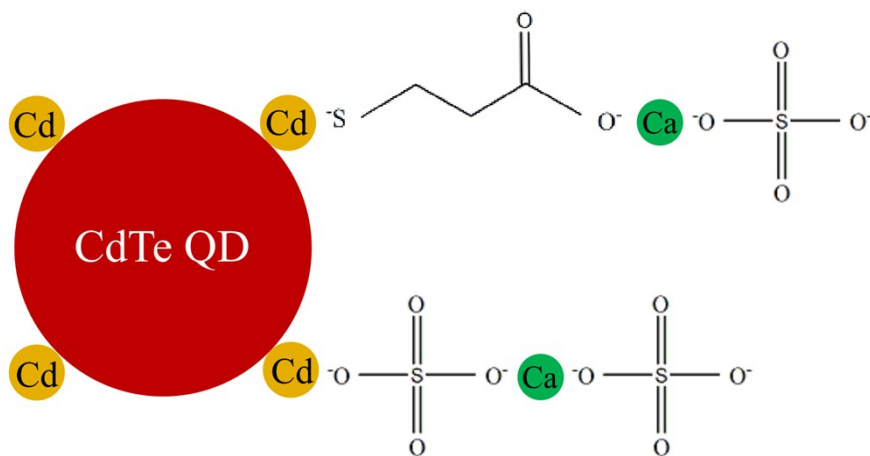

**Fig. S6** Schematic of MPA capped CdTe QD hosted in gypsum.

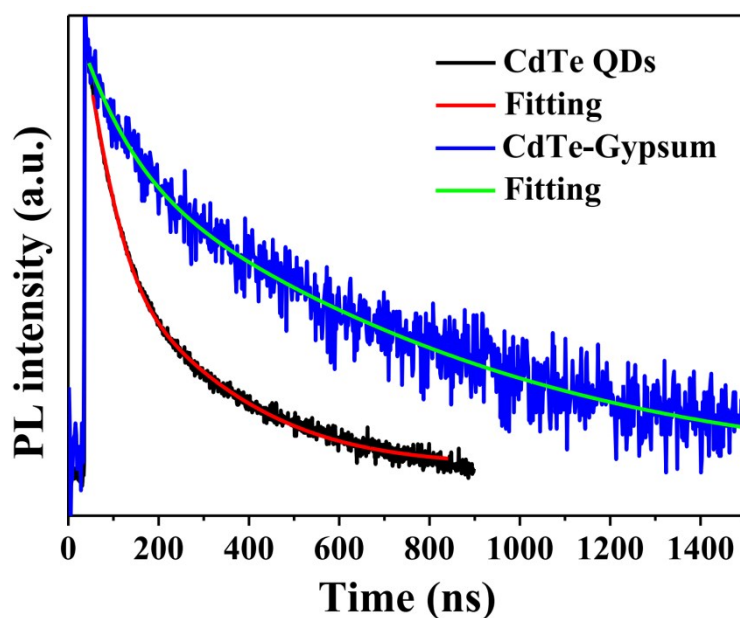

**Fig. S7** Time-resolved PL decay lifetime of CdTe QDs (black curve) and the corresponding CdTe-gypsum nanocomposites (blue curve) as well as their fitting curves. ( $\lambda_{ex} = 370$  nm).

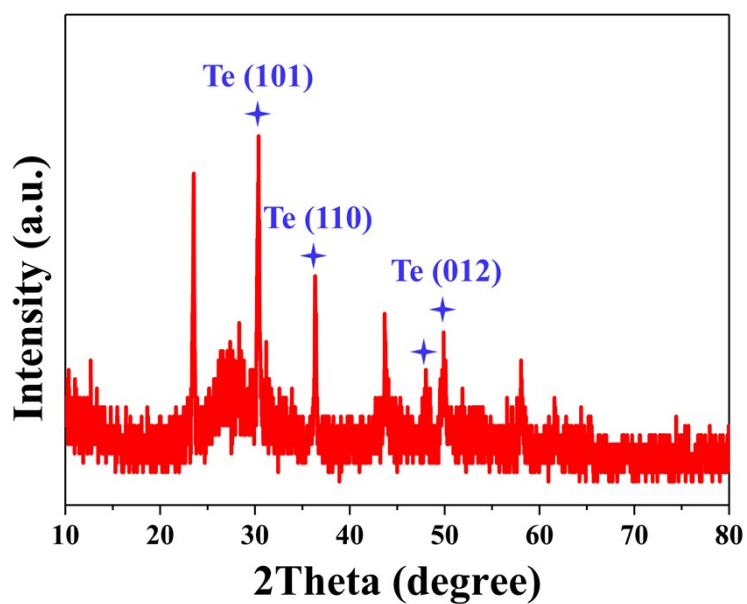

**Fig. S8** XRD pattern of CdTe QDs after UV irradiation for two days. The blue marks show the existence of Te.

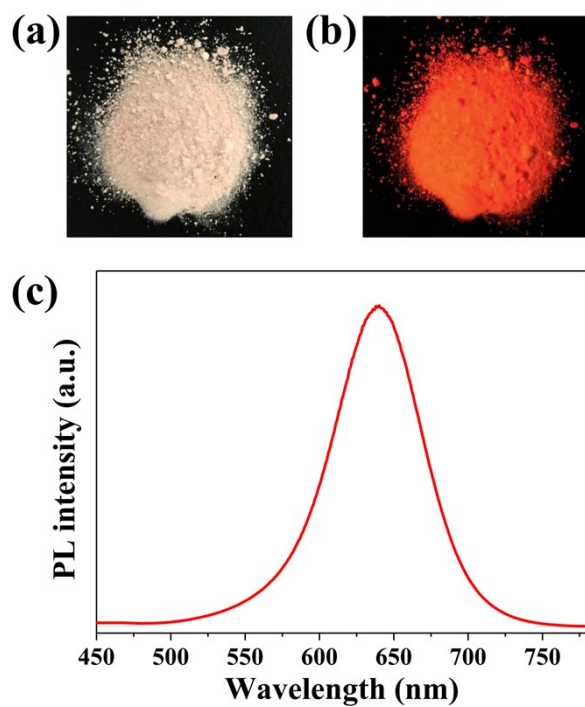

**Fig. S9** Digital image of CdTe-gypsum nanocomposites after being stored over 4 years in ambient condition (a) under daylight and (b) 365 nm UV light. (c) PL spectrum of CdTe-gypsum nanocomposites after being stored over 4 years.

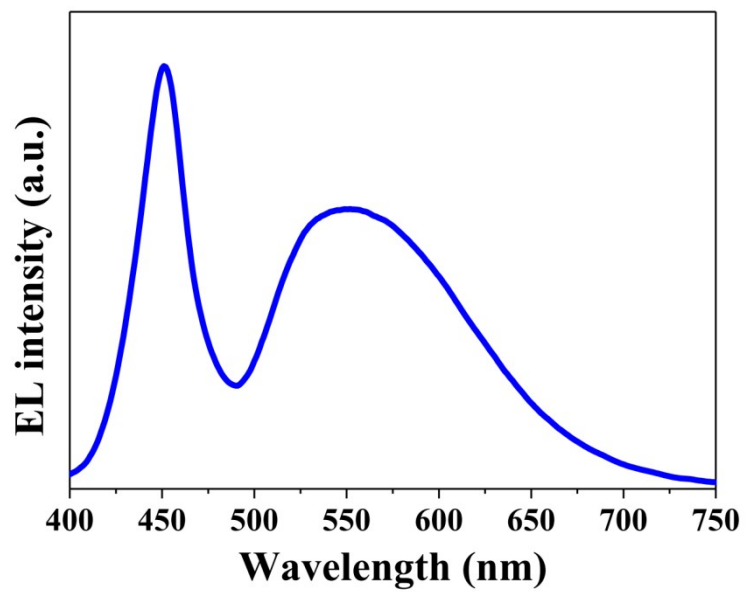

**Fig. S10** EL spectrum of the WLED crafted by using YAG: Ce<sup>3+</sup> phosphors excited with a blue InGaN chip
